# Supplementary material
Source: PubMed Central journal article supplement (PMC2475699)
Supplement: supp_M803493200_Supplementary_S1.pdf [file supp_M803493200_Supplementary_S1.pdf]

Figure S1.

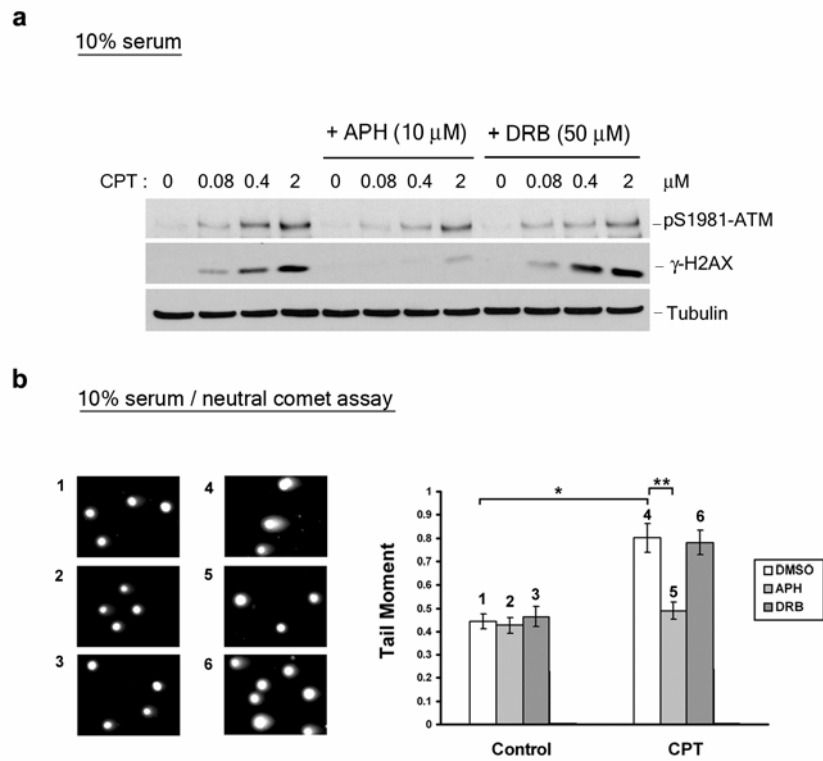

**Figure S1.** CPT-induced  $\gamma$ -H2AX and DNA double-strand breaks are replication-dependent. (a) Proliferating WI-38 cells (cultured in 10% serum) were treated with CPT in the presence and absence of APH (10  $\mu$ M) or DRB (50  $\mu$ M). Cell lysates were immunoblotted with various antibodies as indicated. (b) Proliferating WI-38 cells (cultured in 10% serum) were treated with CPT (25  $\mu$ M) for 1 hr in the presence and absence of APH (10  $\mu$ M) or DRB (50  $\mu$ M). Neutral comet assay was performed as described in Experimental Procedures. The tail moment was determined and plotted against each treatment condition.
