# Supplementary material
Source: PubMed Central journal article supplement (PMC2475699)
Supplement: supp_M803493200_Supplementary_S2.pdf [file supp_M803493200_Supplementary_S2.pdf]

Figure S2.

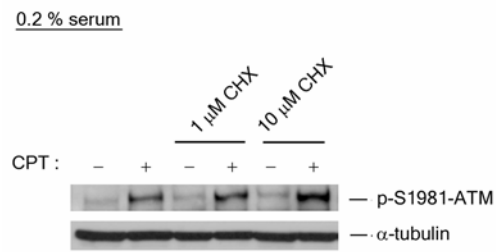

**Figure S2.** CPT-induced ATM autophosphorylation is independent of protein synthesis. Quiescent WI-38 cells were pre-treated with cycloheximide (CHX) for 30 min, followed by co-treatment with 25  $\mu$ M CPT for one hr. Cell lysates were immunoblotted with anti-pS1981-ATM and anti-tubulin antibodies.
