# Supplementary material
Source: PubMed Central journal article supplement (PMC2475699)
Supplement: supp_M803493200_Supplementary_S3.pdf [file supp_M803493200_Supplementary_S3.pdf]

Figure S3.

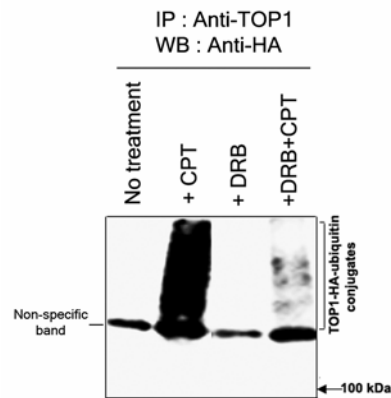

**Figure S3.** CPT induces transcription-dependent formation polyubiquitin chains on Top1. V79 cells were transfected with the HA-Ub cDNA plasmid. 20 hrs post-transfection, cells were treated with 25  $\mu$ M CPT for 30 min in the presence and absence of the transcription inhibitor DRB (150  $\mu$ M). Top1 was immunoprecipitated from cell lysates using hTop1 antiserum as described in Experimental Procedures. Immunoprecipitates were then immunoblotted with anti-HA antibody.
